# Supplementary figures and images for: Framing of grid cells within and beyond navigation boundaries
Source: eLife journal article supplement (doi:10.7554/elife.21354), 2017-01-13

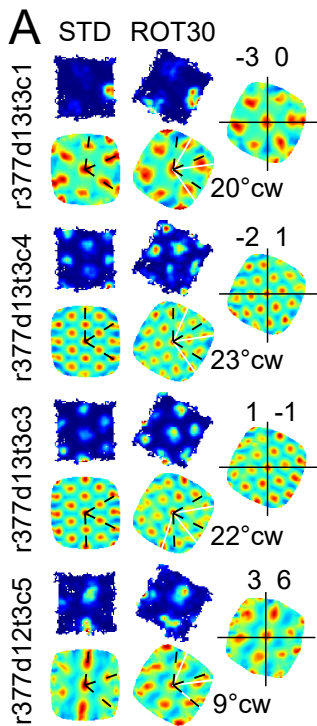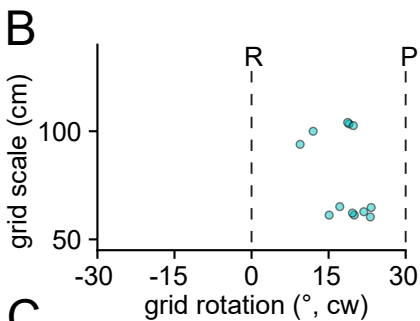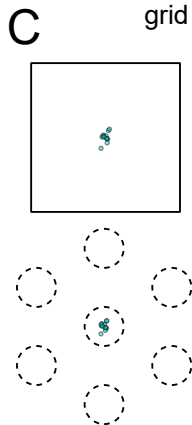

Supplement: supp [file elife-21354-supp-v1.zip]

Rat 332 - GEOMETRY

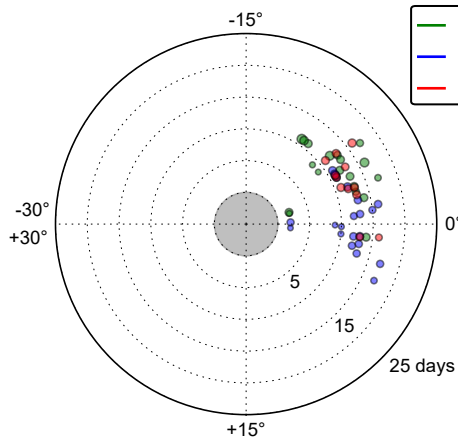

Rat 332 - PLATFORM

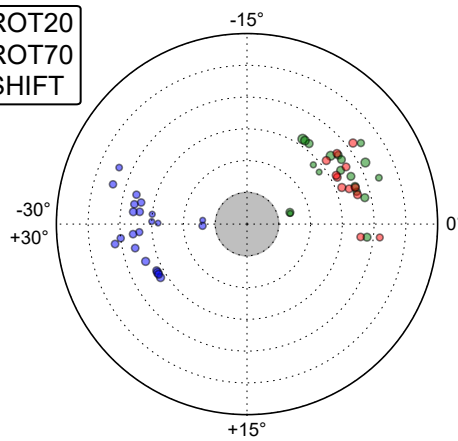

Rat 332 - ROOM

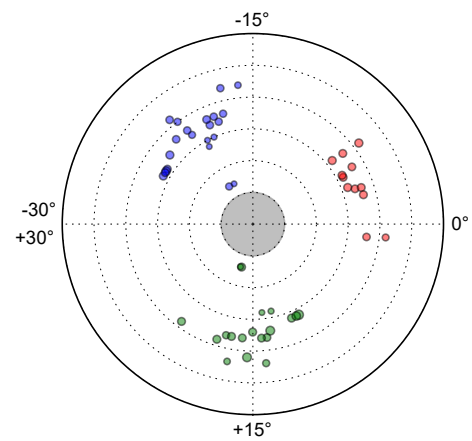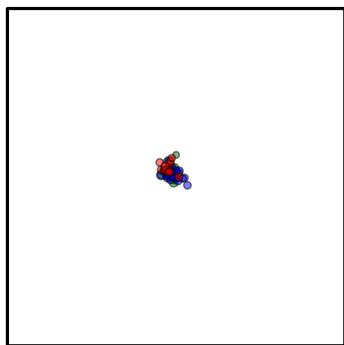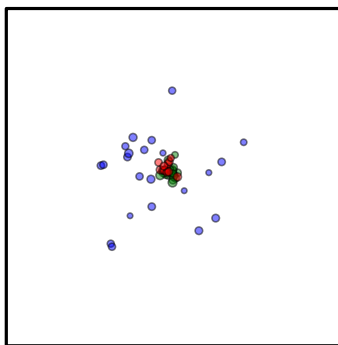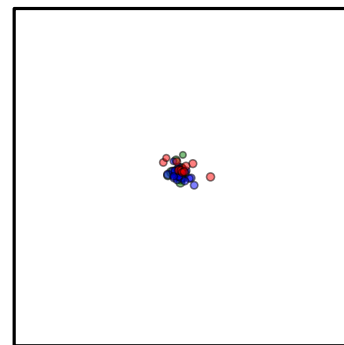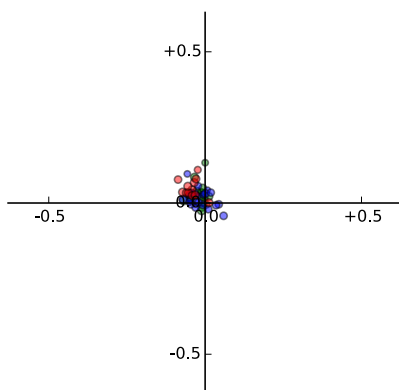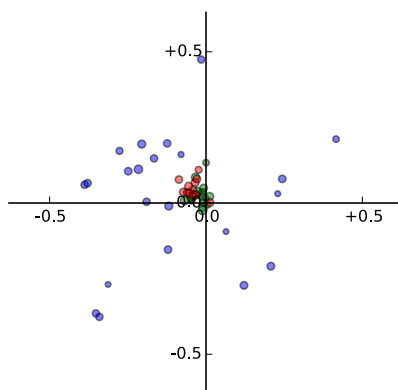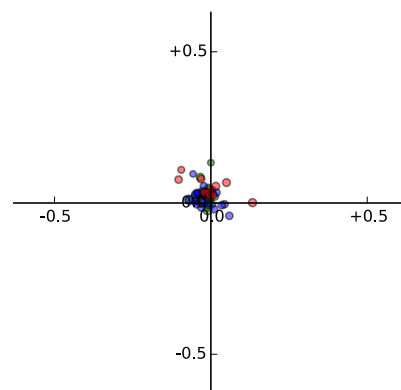

Supplement: supp [file elife-21354-supp-v1.zip]

Rat 334 - GEOMETRY

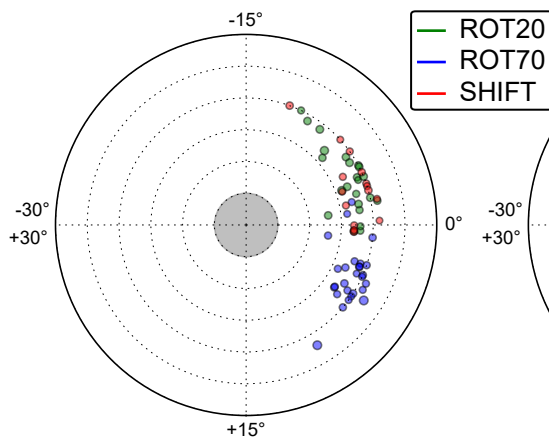

Rat 334 - PLATFORM

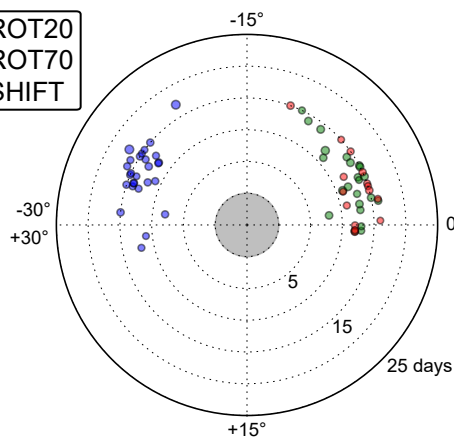

Rat 334 - ROOM

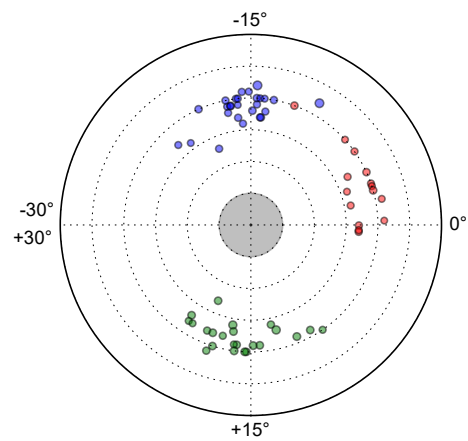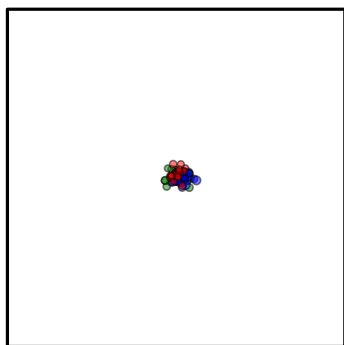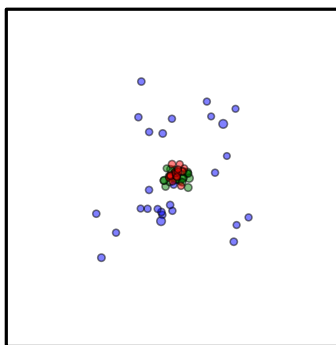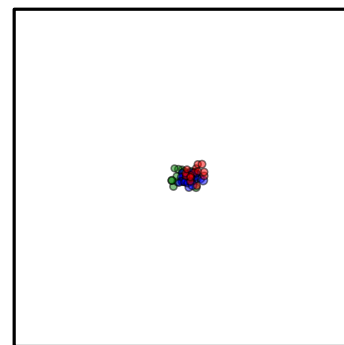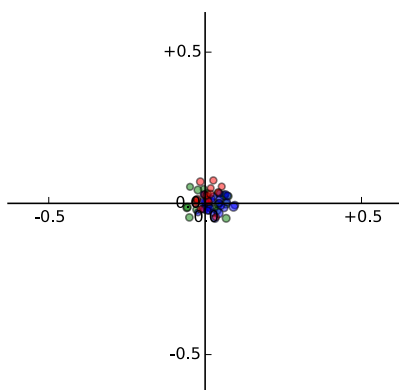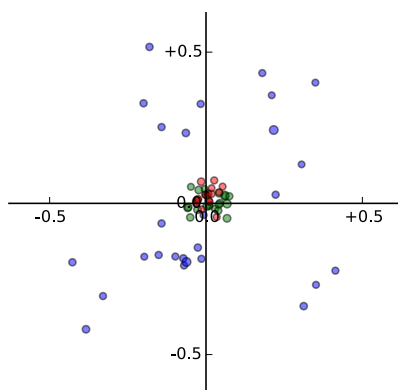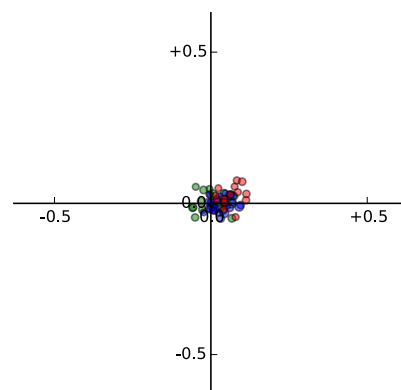

Supplement: supp [file elife-21354-supp-v1.zip]

Rat 292 - GEOMETRY

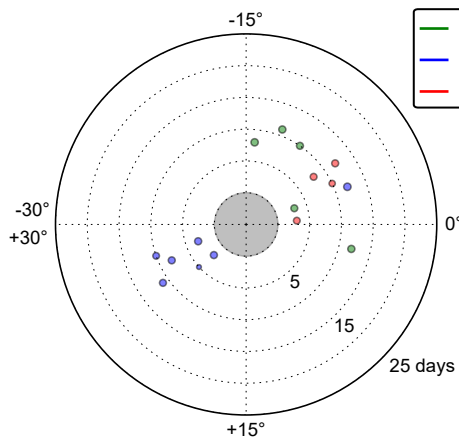

Rat 292 - PLATFORM

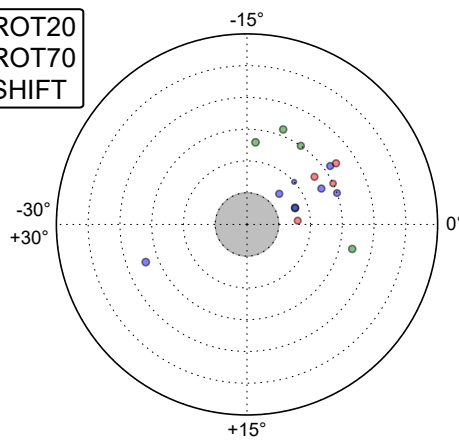

Rat 292 - ROOM

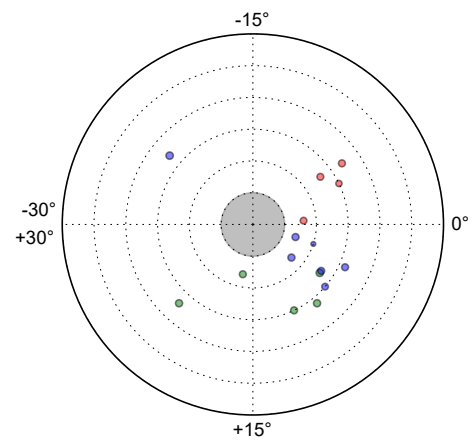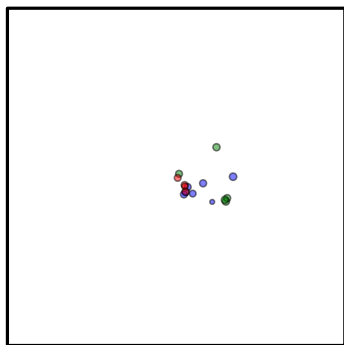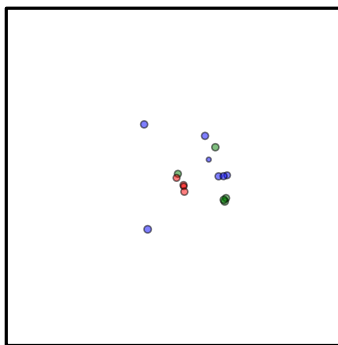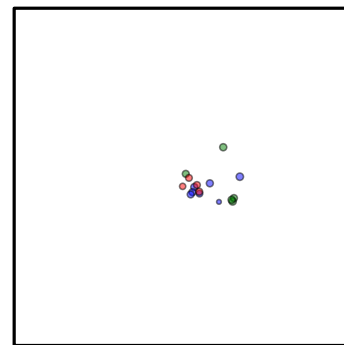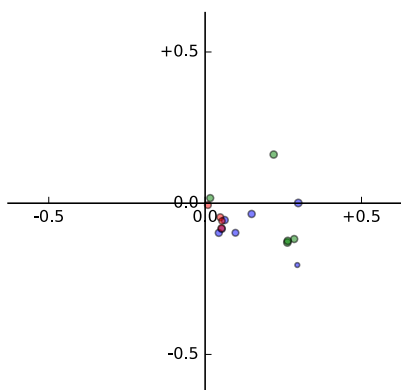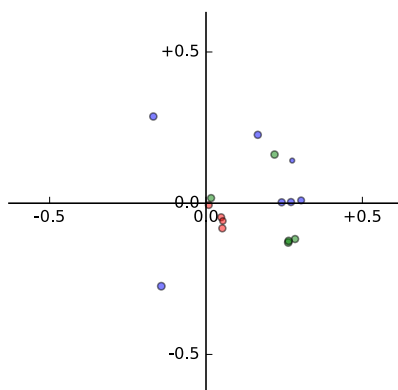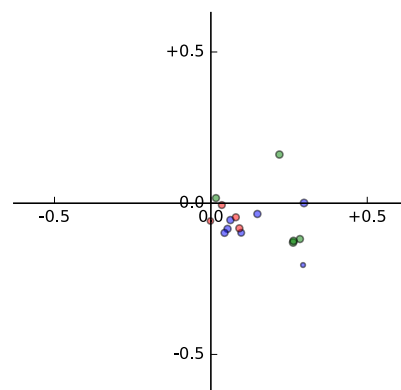

Supplement: supp [file elife-21354-supp-v1.zip]

Rat 377 - GEOMETRY

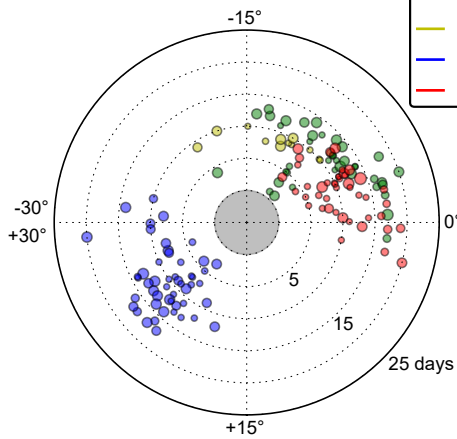

— ROT20  
— ROT30  
— ROT70  
— SHIFT

Rat 377 - PLATFORM

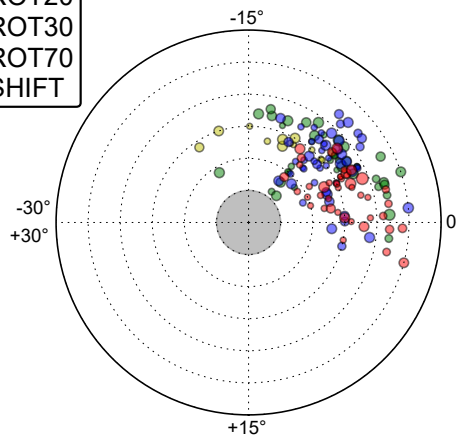

Rat 377 - ROOM

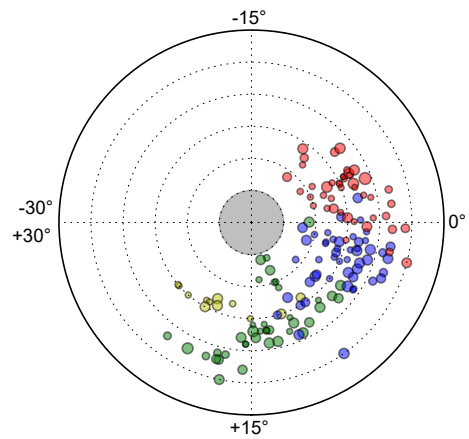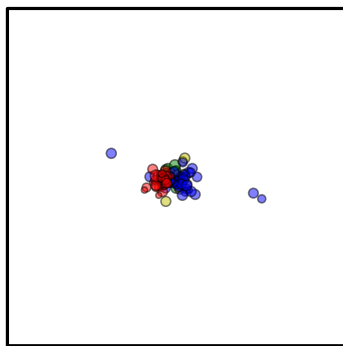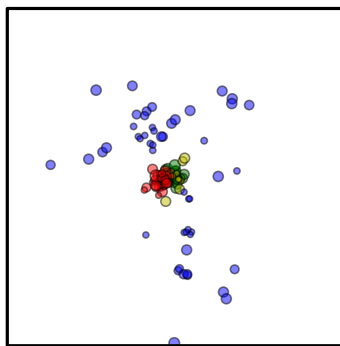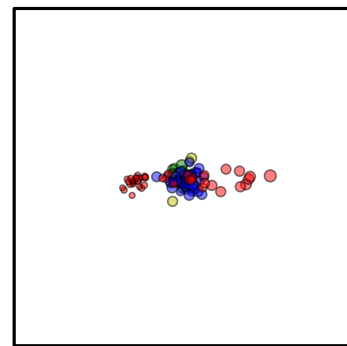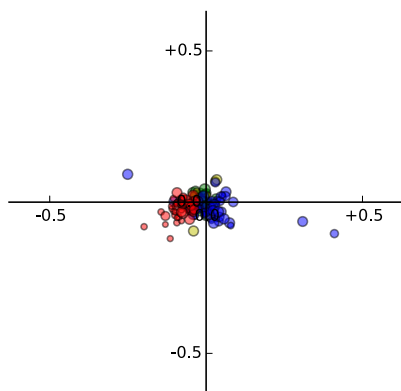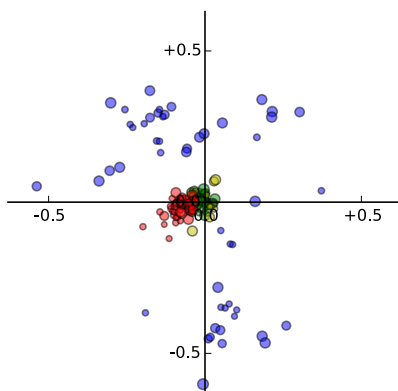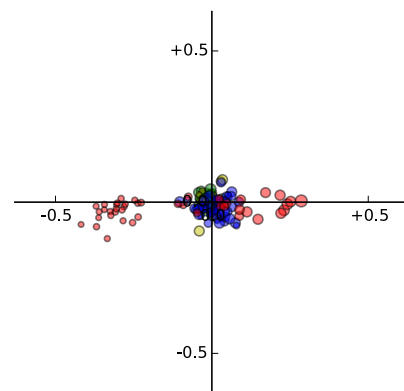

Supplement: supp [file elife-21354-supp-v1.zip]

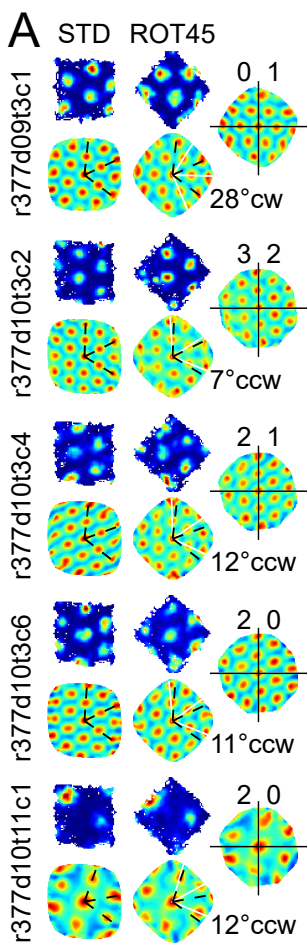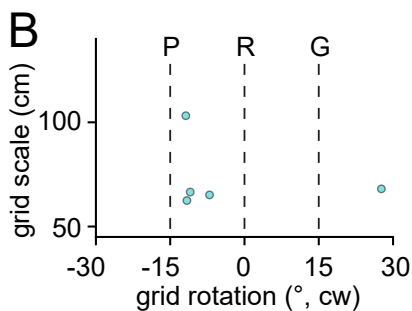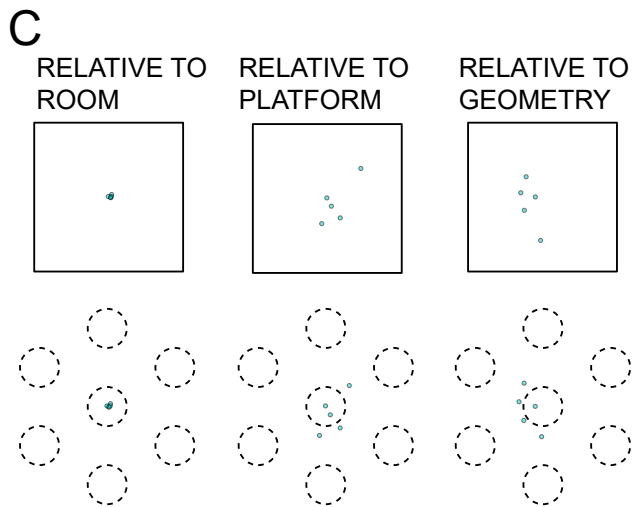

Supplement: supp [file elife-21354-supp-v1.zip]

day 4

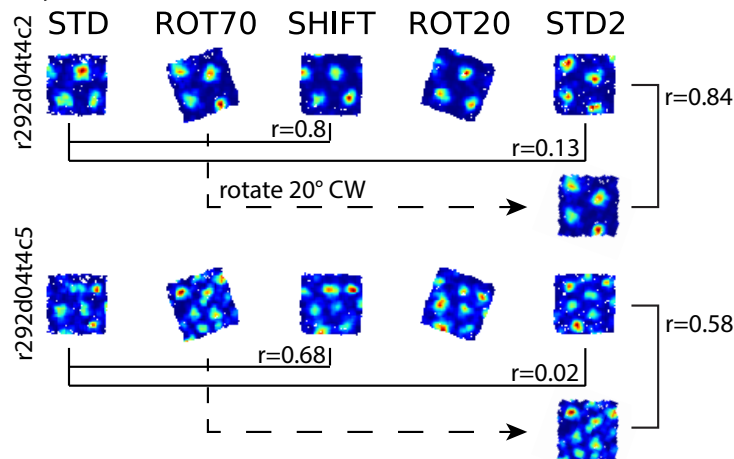

day 12

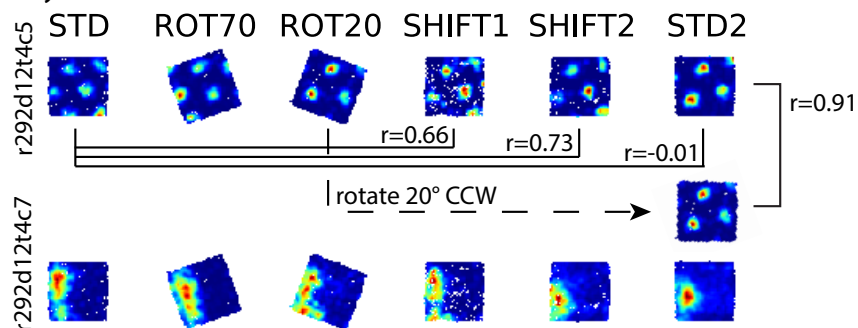

day 13

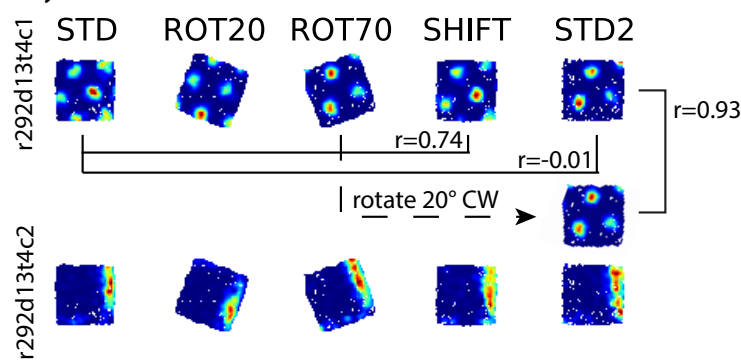

Supplement: supp [file elife-21354-supp-v1.zip]

**A**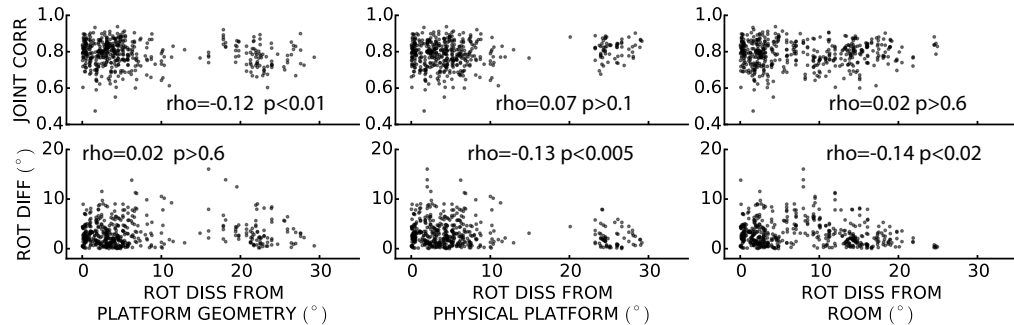**B**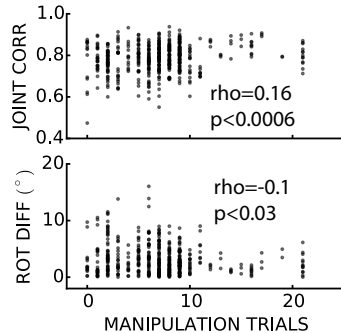

Supplement: supp [file elife-21354-supp-v1.zip]

Rat 262 - GEOMETRY

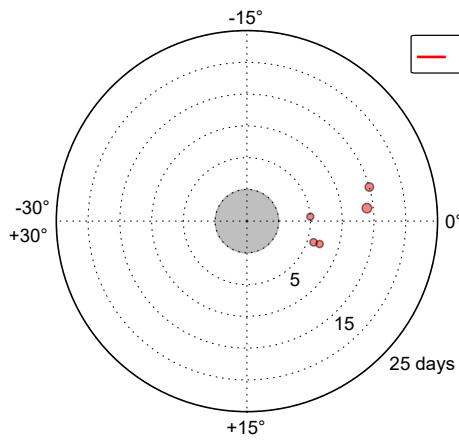

Rat 262 - PLATFORM

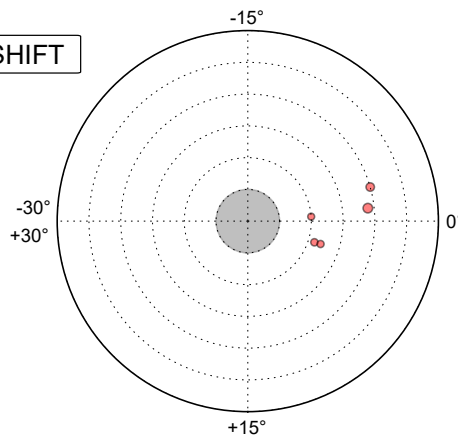

Rat 262 - ROOM

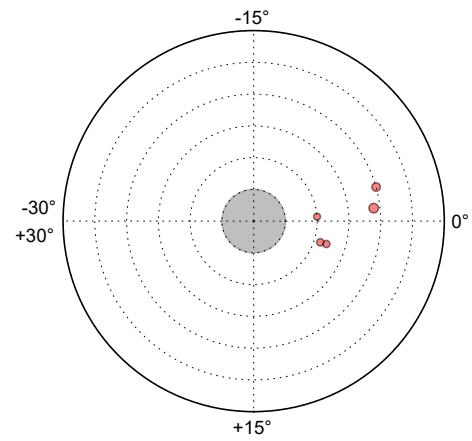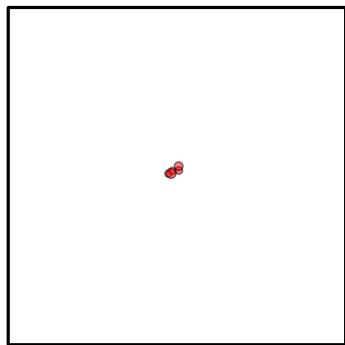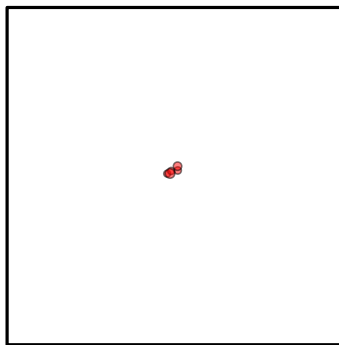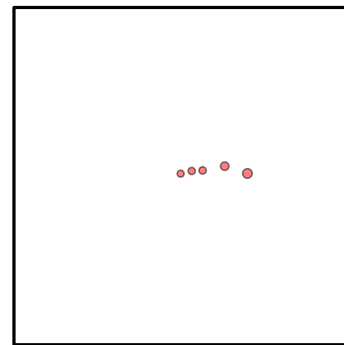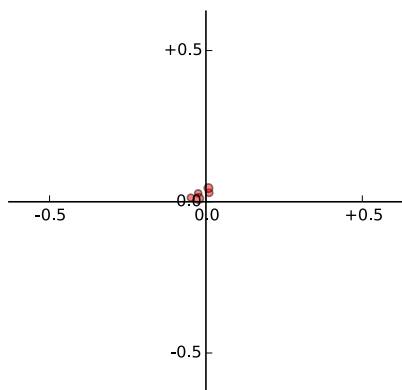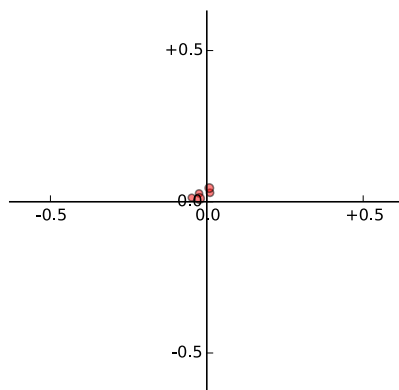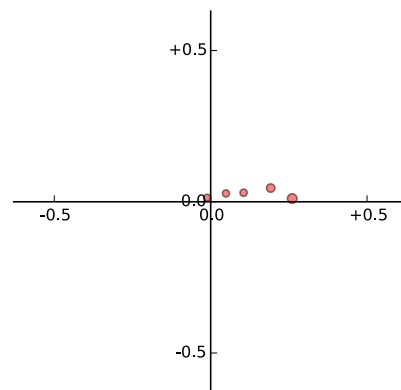

Supplement: supp [file elife-21354-supp-v1.zip]

A

day 4

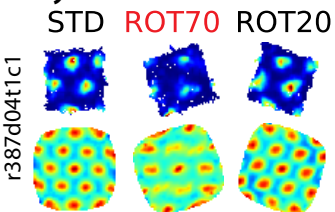

day 5

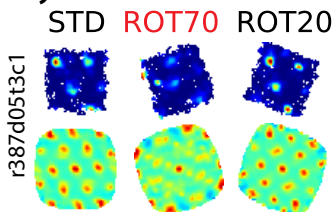

day 8

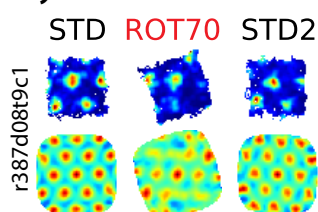

day 12

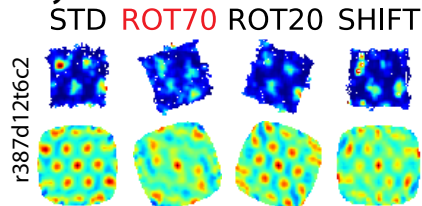

day 17

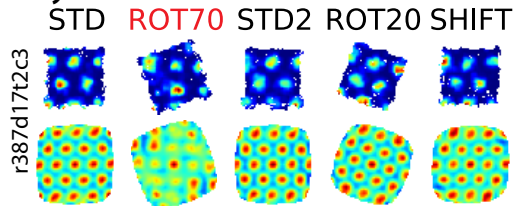

day 18

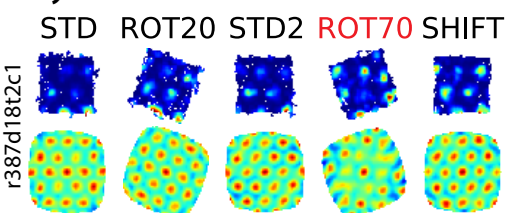

day 21

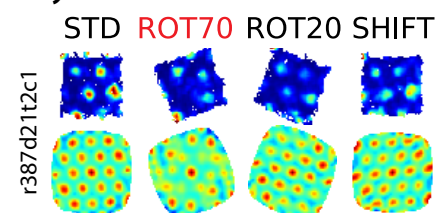

B

day 9

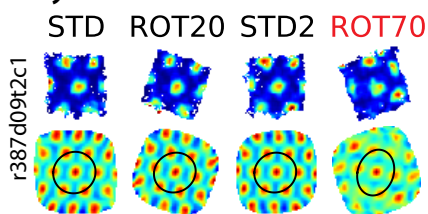

day 20

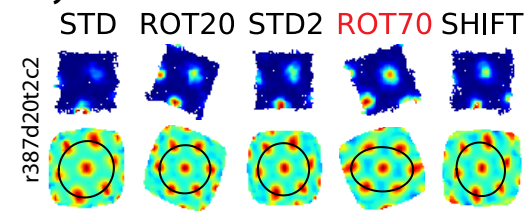

C

day 13

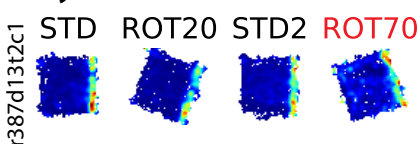

Supplement: supp [file elife-21354-supp-v1.zip]

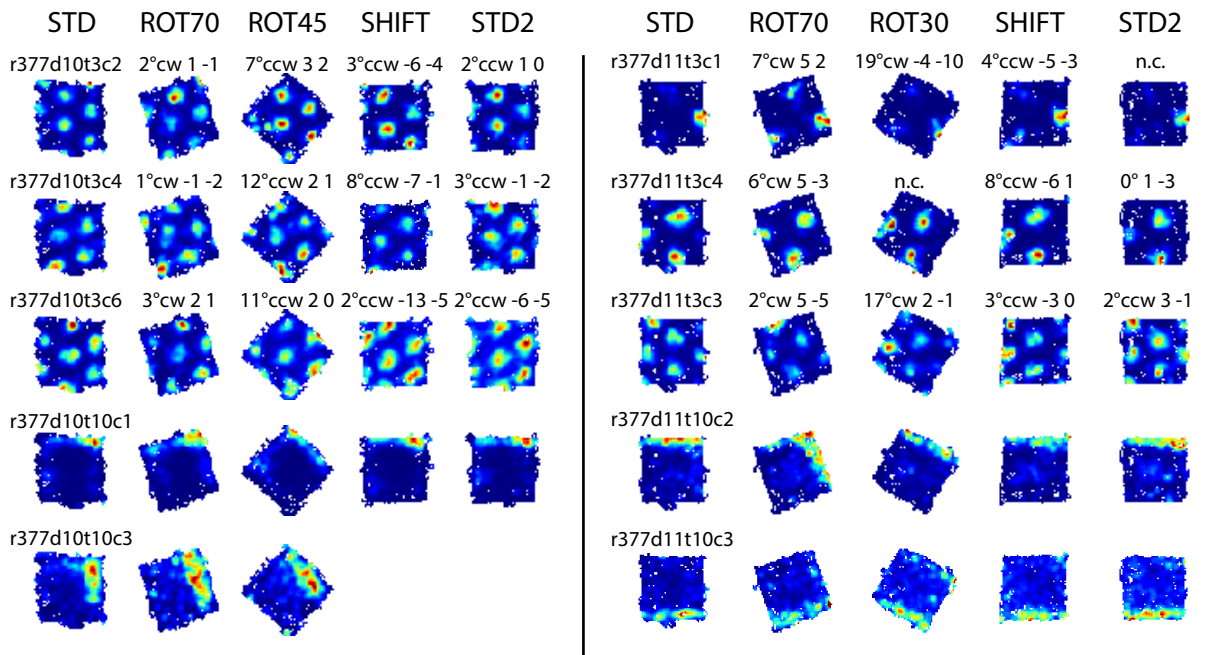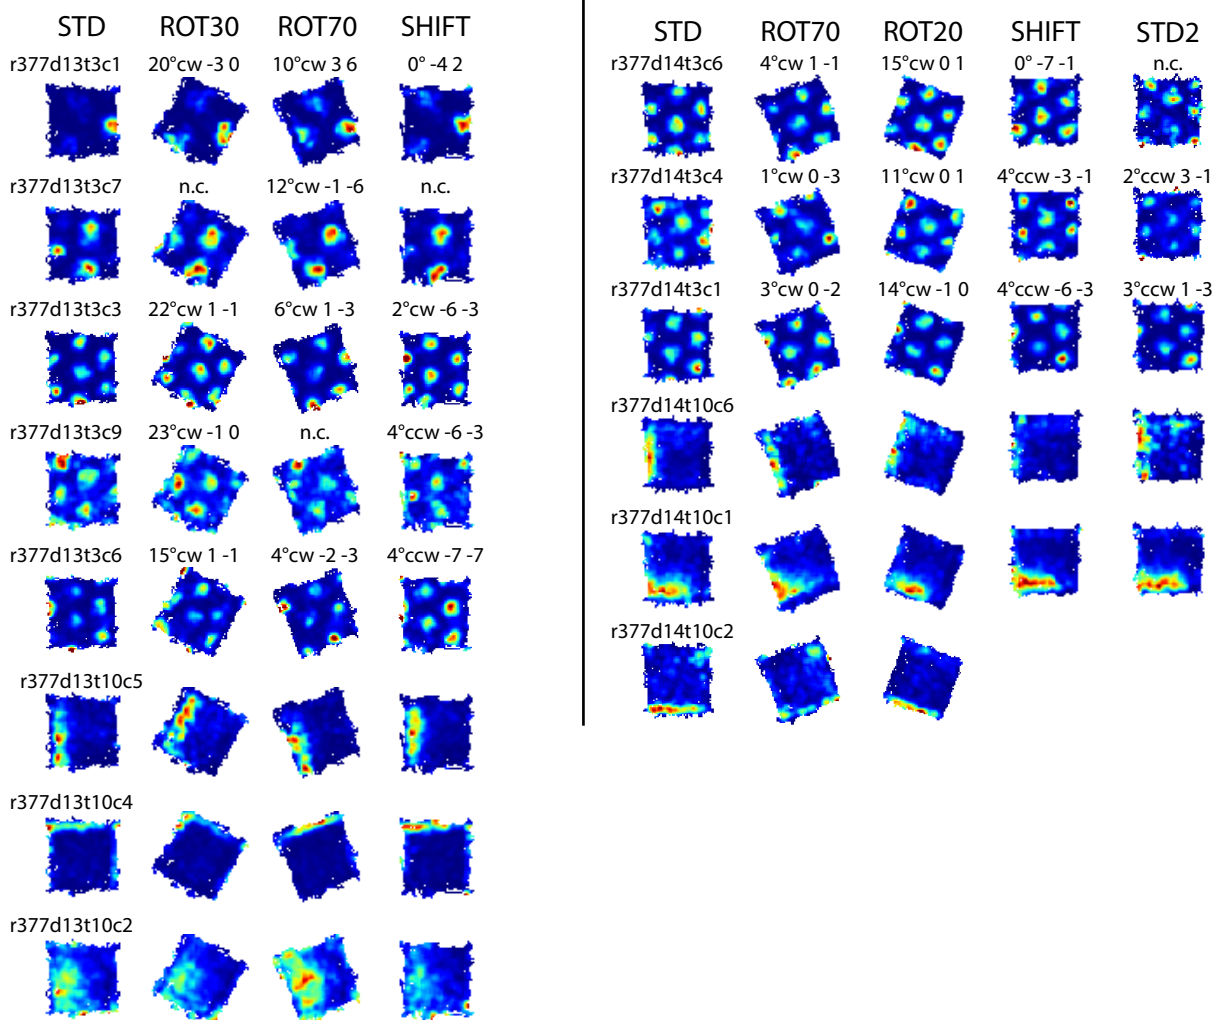

Supplement: supp [file elife-21354-supp-v1.zip]

Rat 263 - GEOMETRY

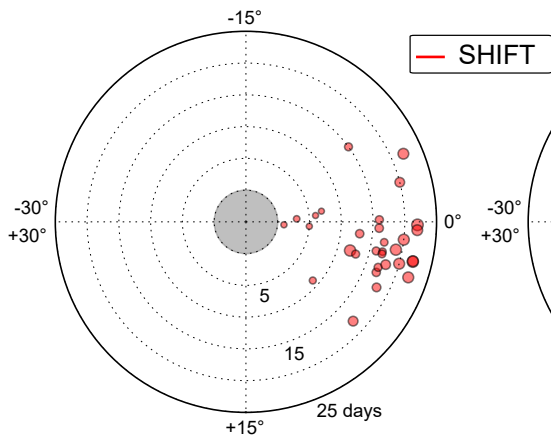

Rat 263 - PLATFORM

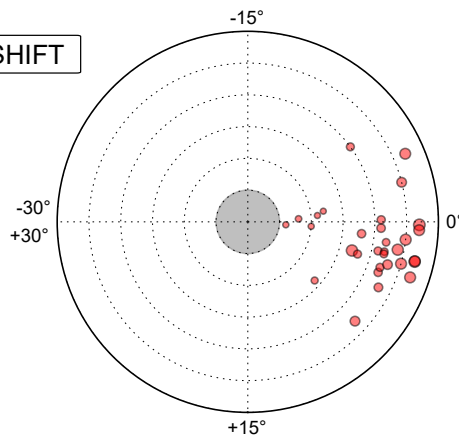

Rat 263 - ROOM

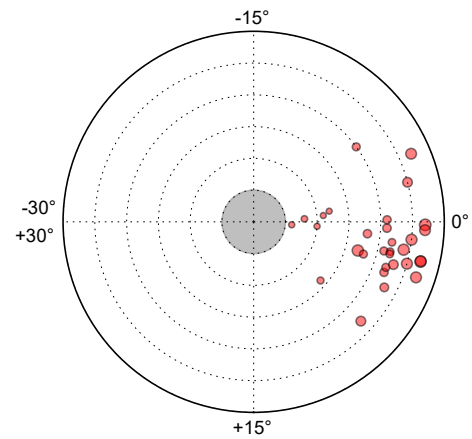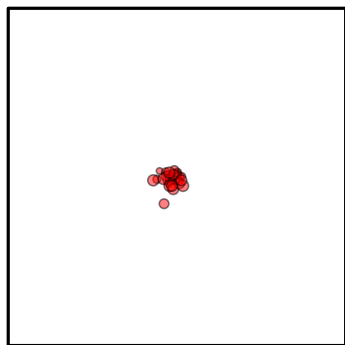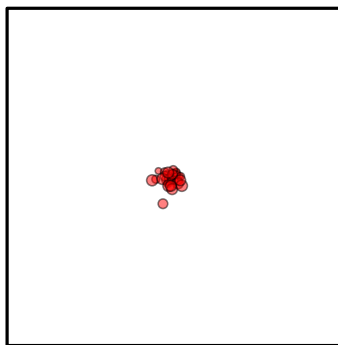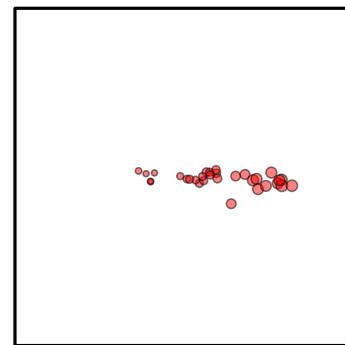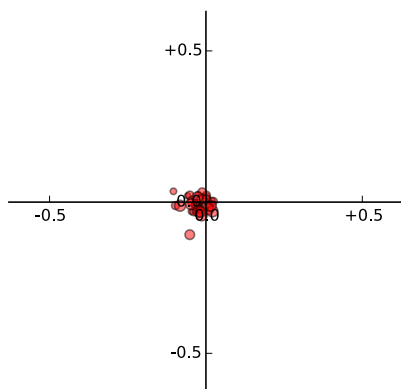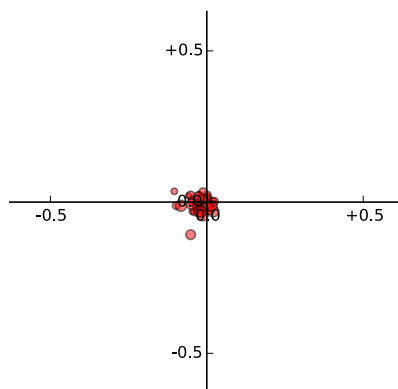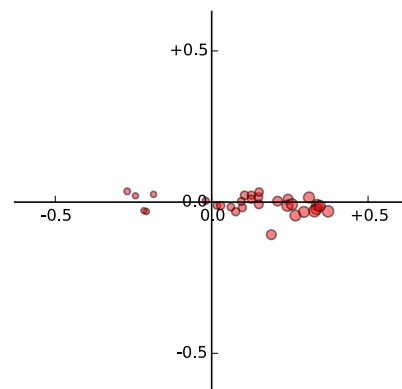

Supplement: supp [file elife-21354-supp-v1.zip]

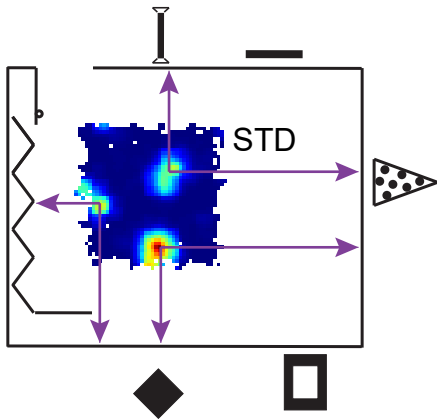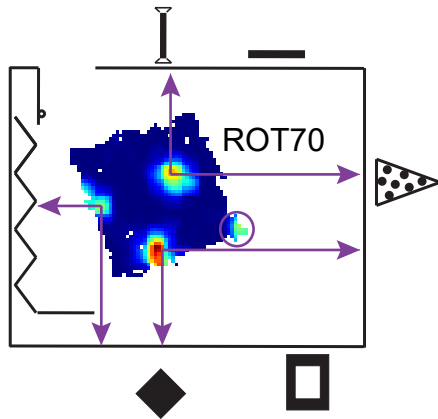

Supplement: supp [file elife-21354-supp-v1.zip]

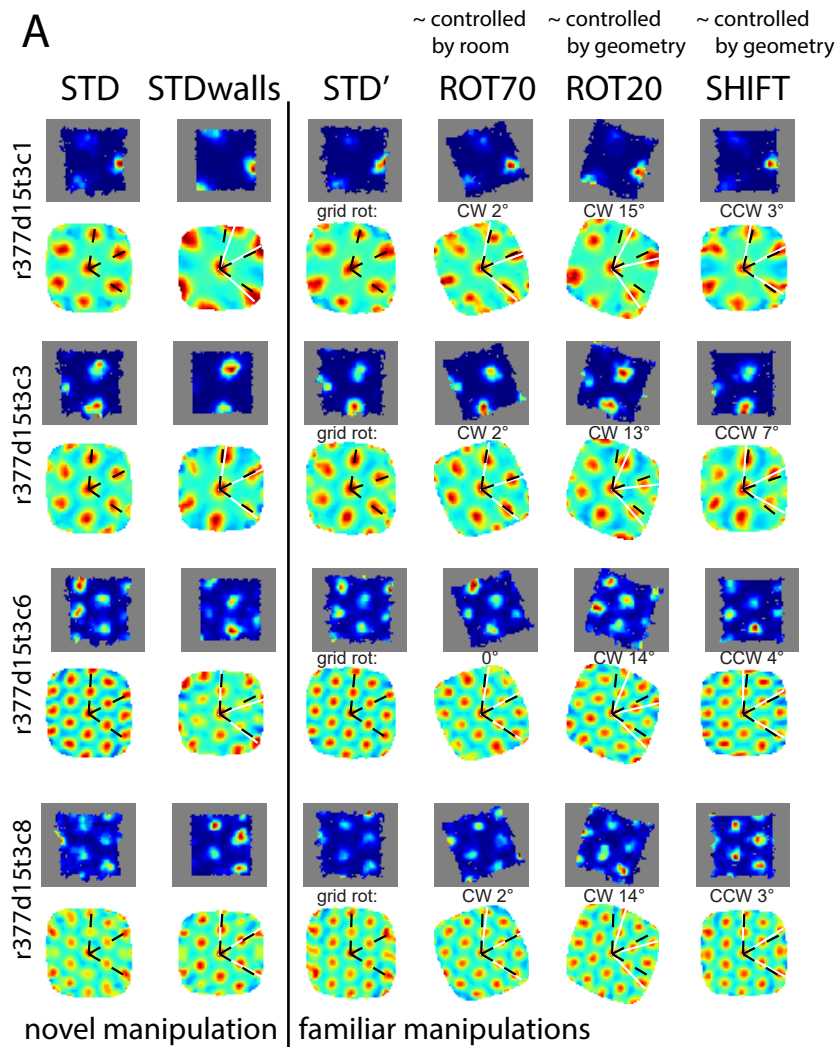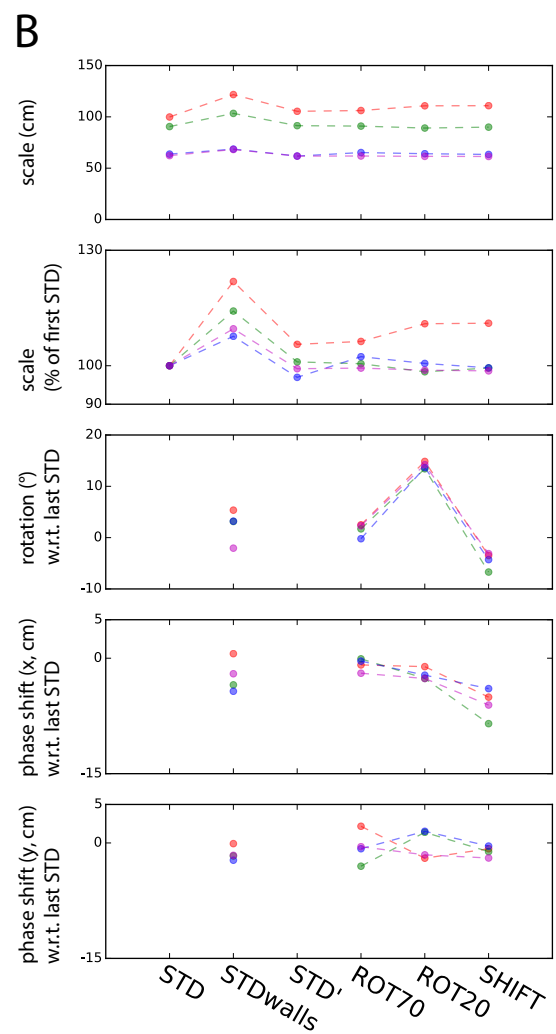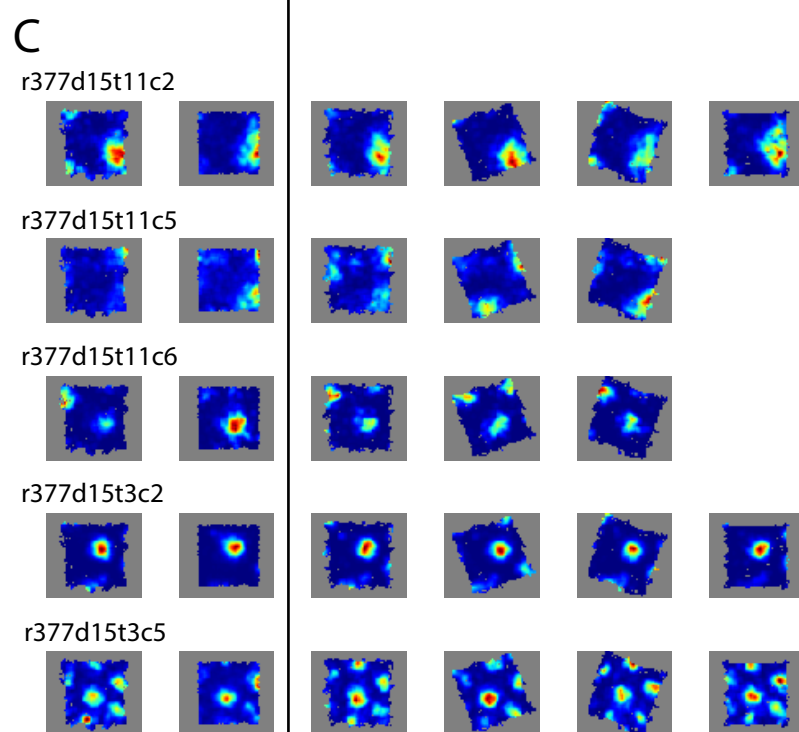

Supplement: supp [file elife-21354-supp-v1.zip]

Rat 387 - GEOMETRY

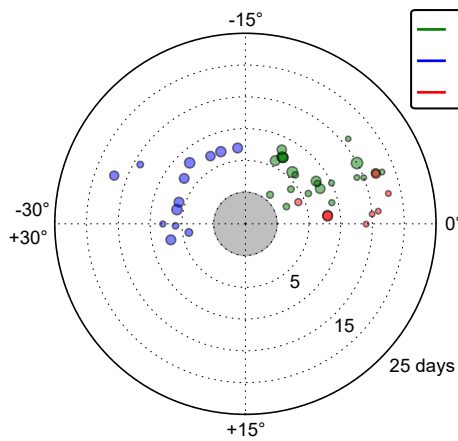

Rat 387 - PLATFORM

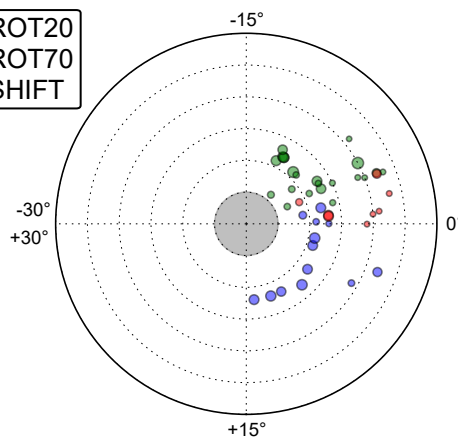

Rat 387 - ROOM

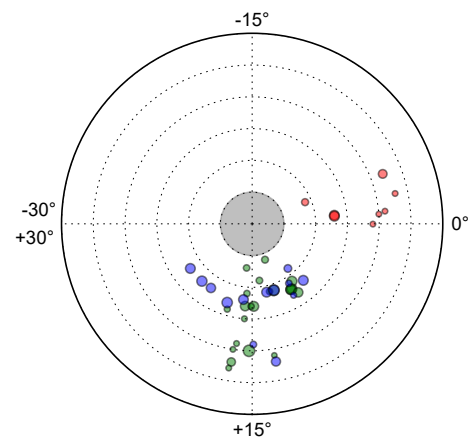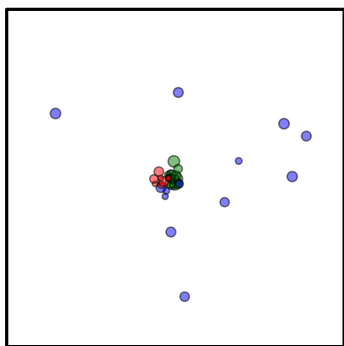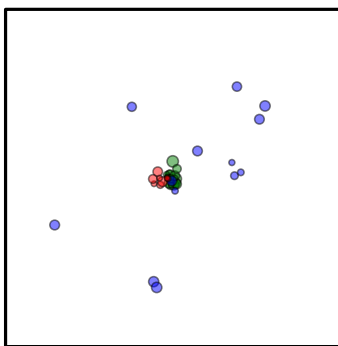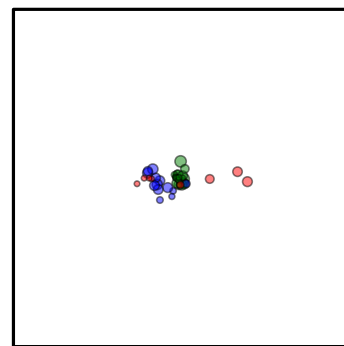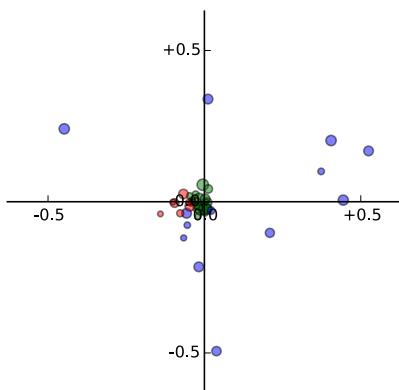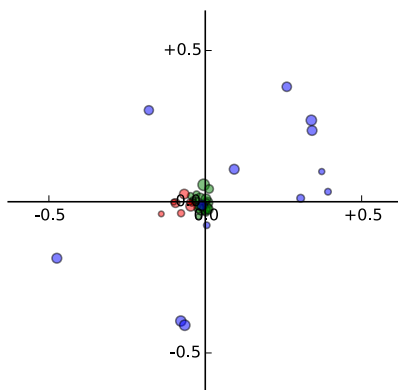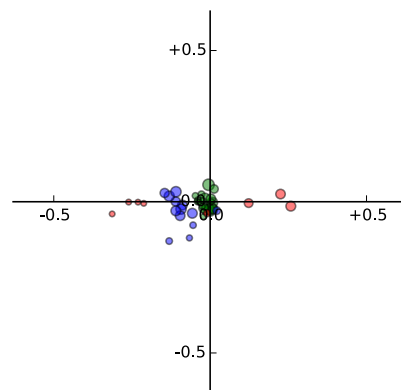

Supplement: supp [file elife-21354-supp-v1.zip]
